# Supplementary material
Source: Springer Nature journal article supplement (https://www.springermedizin.de/resource/supplementary/12979_2009_68_MOESM3_ESM.pdf/9603326)

# Naive T cells

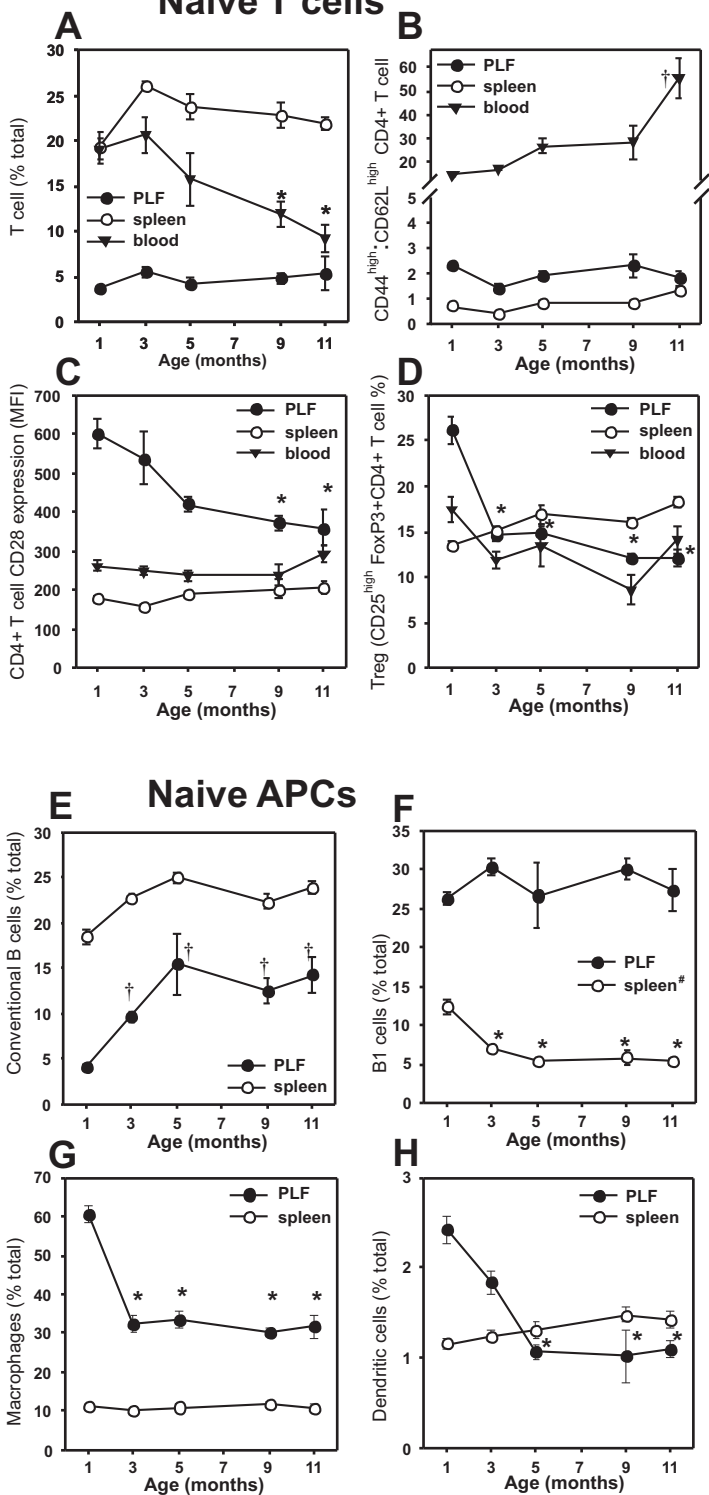

Supplement: MOESM3 [file 9603326]
